# Supplementary material for: Tunable electronic properties of arsenene/GaS van der Waals heterostructures
Source: Royal Society of Chemistry journal article supplement (doi:10.1039/c7ra03748a), 2017-01-01
Supplement: c7ra03748a1.pdf [file c7ra03748a1.pdf]

## Supplementary material

### Tunable electronic properties of arsenene/GaS van der Waals heterostructures

Xiao-Hua Li,<sup>1</sup> Bao-Ji Wang,<sup>1,\*</sup> Xiao-Lin Cai,<sup>1</sup> Li-Wei Zhang,<sup>1</sup> Guo-Dong Wang,<sup>1</sup> and San-Huang Ke<sup>2,†</sup>

<sup>1</sup>School of Physics and Electronic Information Engineering, Henan Polytechnic University, Jiaozuo 454000, P. R.

China

<sup>2</sup>MOE Key Laboratory of Microstructured Materials, School of Physics Science and Engineering, Tongji University,

Shanghai 200092, P. R. China

\*Corresponding author: [wbj@hpu.edu.cn](mailto:wbj@hpu.edu.cn)

†Corresponding author: [shke@tongji.edu.cn](mailto:shke@tongji.edu.cn)

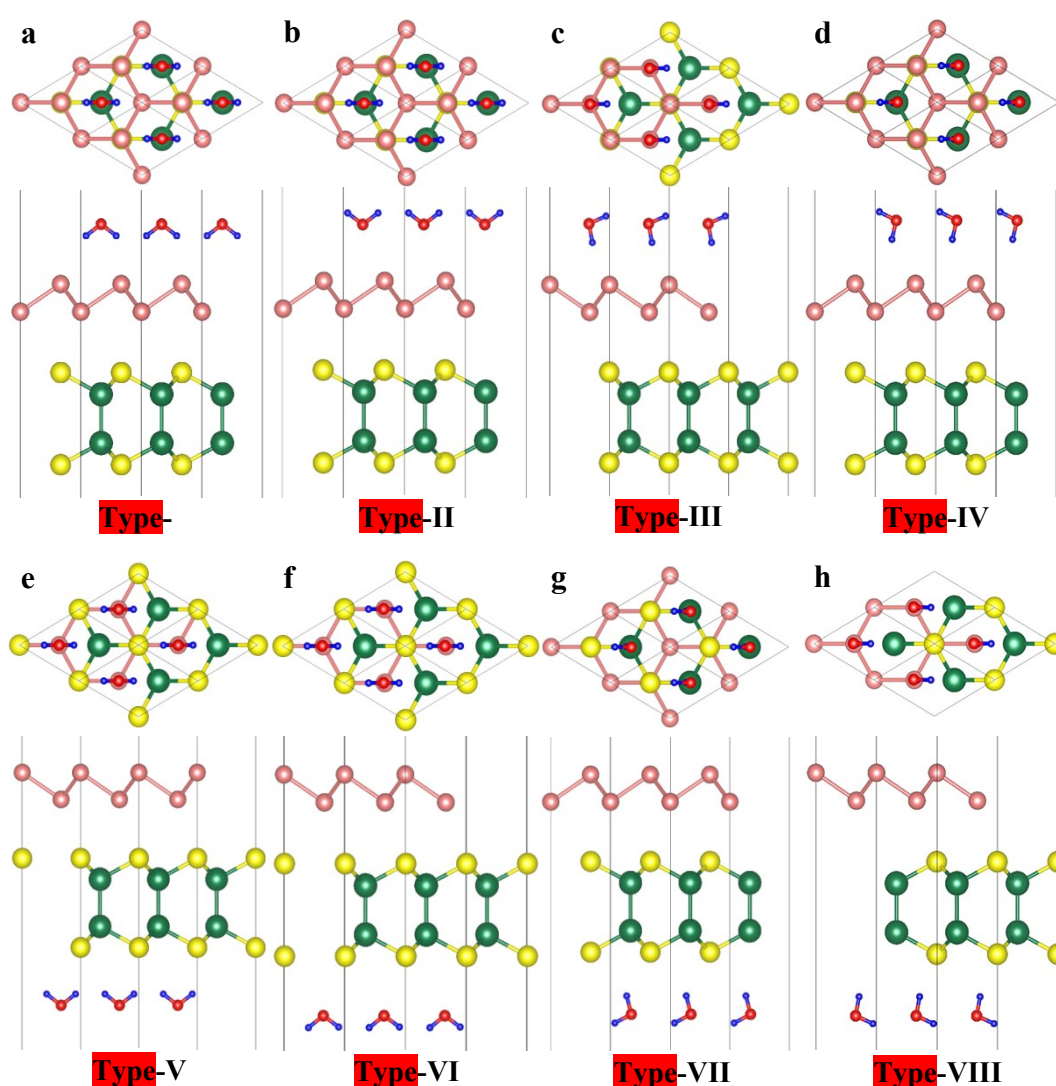

Fig. S1. (Color online) Different water adsorption configurations considered. The two-leg structures (a, b, e, f) and one-leg structures (c, d, g, h) are shown from the above (or bottom) and side. Here, “two-leg” means that the two hydrogen atoms are equidistant from the surface, while “one-leg” means that one of the two OH bonds directs the surface.[Ref.37]

Table S1. Calculated adsorption energy  $E_{\text{ads}}$  and height  $d$  (water-surface perpendicular distance) for the different adsorption configurations (see Fig. S1). The adsorption energy is defined as  $E_{\text{ads}} = E_{\text{water/heterostructure}} - E_{\text{water}} - E_{\text{heterostructure}}$ , where  $E_{\text{water/heterostructure}}$ ,  $E_{\text{heterostructure}}$ , and  $E_{\text{water}}$  are the total energies of the water-heterostructure system, clean heterostructure, and the isolated water molecule, respectively [Ref.37]. Note that the Type-III configuration has the lowest adsorption energy.

| Configuration         | Type-I | Type-II | Type-III | Type-IV | Type-V | Type-VI | Type-VII | Type-III |
|-----------------------|--------|---------|----------|---------|--------|---------|----------|----------|
| $E_{\text{ads}}$ (eV) | -0.133 | -0.108  | -0.323   | -0.319  | -0.094 | -0.072  | -0.291   | -0.295   |
| H/O-surface           | As-H   | As-O    | As-H     | As-H    | S-H    | S-O     | S-H      | S-H      |
| $d$ (Å)               | 2.42   | 2.79    | 2.15     | 2.24    | 2.53   | 2.96    | 2.24     | 2.13     |

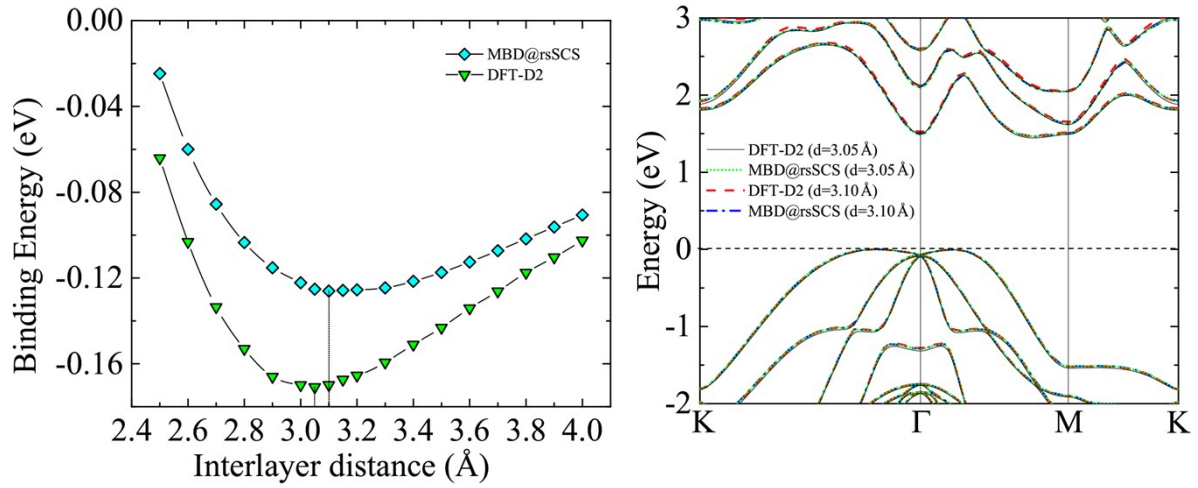

Fig.S2. (Color online) (a) Binding energies as functions of the interlayer distance and (b) band structures given by different vdW corrections: DFT-D2 and MBD@rsSCS.
